# Supplementary material for: Versatile electrification of two-dimensional nanomaterials in water
Source: PubMed Central journal article supplement (PMC6458114; doi:10.1038/s41467-019-09708-7), 2019-04-10
Supplement: 41467_2019_9708_MOESM3_ESM.pdf [file 41467_2019_9708_MOESM3_ESM.pdf]

## **Description of Additional Supplementary Files**

File Name: Supplementary Movie 1

Description: 20 ps long non-biased trajectory of a hydroxide physisorbed on h-BN in water. The hydroxide, hydrogen, boron, nitrogen and oxygen atoms are respectively represented in cyan, white, orange, blue and red.

File Name: Supplementary Movie 2

Description: 20 ps long non-biased trajectory of a hydroxide physisorbed on graphene in water. The hydroxide, hydrogen, carbon and oxygen atoms are respectively represented in cyan, white, grey and red.

File Name: Supplementary Movie 3

Description: 500 fs long non-biased trajectory of a hydroxide initially chemisorbed on h-BN (left) or graphene (right) in water. The hydroxide, hydrogen, boron, carbon, nitrogen and oxygen atoms are respectively represented in cyan, white, orange, grey, blue and red.
